# Supplementary material for: Palladium(ii) allyl complexes of chiral diphosphazane ligands: ambident coordination behaviour and stereodynamic studies in solutionOrganometallic chemistry of diphosphazanes. Part 17.11g.Electronic supplementary information (ESI) available: NMR and crystallographic data, stereodynamic behaviour schemes. See http://www.rsc.org/suppdata/dt/b2/b207447h/
Source: Royal Society of Chemistry journal article supplement (doi:10.1039/b207447h), 2003-02-04

Supplementary Material (ESI) for Dalton Transactions  
This journal is © The Royal Society of Chemistry 2003

## Electronic Supplementary Information

**Title :** Palladium(II) Allyl Complexes of Chiral Diphosphazane Ligands:  
Ambident Coordination Behaviour and Stereodynamic Studies in Solution

**Authors :** Swadhin K.Mandal,<sup>a</sup> G. A. Naganagowda,<sup>b</sup> Setharampattu. S.

Krishnamurthy\*<sup>a</sup> and Munirathinam Nethaji<sup>a</sup>

<sup>a</sup>Department of Inorganic and physical Chemistry, <sup>b</sup>Sophisticated Instruments Facility,  
Indian Institute of Science, Bangalore-560012, India.

\*To whom correspondence to be addressed, Fax : +91-80-3600683, 3601552

e-mail : sskrish@ipc.iisc.ernet.in

**Journal to which manuscript submitted :** J. Chem. Soc. Dalton Trans.

Paper Ref: **B207447H**

### NMR data for $\eta^3$ -allyl palladium complexes (4-13)

The  $^1\text{H}$  and  $^{13}\text{C}$  NMR data for the allyl moiety are given in Table E S 1 and Table E S 2 respectively. The remaining NMR data are listed below under each complex.

*Endo-* (**4a**)  $^1\text{H}$  NMR (400 MHz,  $\text{CDCl}_3$ ):  $\delta$  7.70 – 6.93 (m, aryl protons); 6.28 (br.s,  $\text{CH-N}_2\text{C}_3\text{HMe}_2$ -3,5); 3.79 (m,  $\text{CH-CHMe}_2$ ); 2.65 (s, 5- $\text{CH}_3$ - $\text{N}_2\text{C}_3\text{HMe}_2$ -3,5); 2.05 (s, 3- $\text{CH}_3$ - $\text{N}_2\text{C}_3\text{HMe}_2$ -3,5); 1.25 (d,  $^3\text{J}(\text{H,H}) = 6.4$  Hz,  $\text{CH}_3$ - $\text{CHMe}_2$ ); 1.15 (d,  $^3\text{J}(\text{H,H}) = 6.4$  Hz,  $\text{CH}_3$ - $\text{CHMe}_2$ ).  $^{13}\text{C}$  NMR (100.6 MHz,  $\text{CDCl}_3$ ):  $\delta$  158.5 – 129.7 (aryl carbons); 110.4 (s,  $\text{CH-N}_2\text{C}_3\text{HMe}_2$ -3,5); 53.2 (dd,  $^2\text{J}(\text{C,P}) = 27.6$  and 5.9 Hz,  $\text{CH-CHMe}_2$ ); 26.1 (d,  $^3\text{J}(\text{C,P}) = 9.2$  Hz,  $\text{CH}_3$ - $\text{CHMe}_2$ ); 24.9 (d,  $^3\text{J}(\text{C,P}) = 18.2$  Hz,  $\text{CH}_3$ - $\text{CHMe}_2$ ); 16.2 (s,  $\text{CH}_3$ - $\text{N}_2\text{C}_3\text{HMe}_2$ -3,5); 13.8 (s,  $\text{CH}_3$ - $\text{N}_2\text{C}_3\text{HMe}_2$ -3,5).

*Exo-* (**4b**)  $^1\text{H}$  NMR (400 MHz,  $\text{CDCl}_3$ ):  $\delta$  6.34 (br.s,  $\text{CH-N}_2\text{C}_3\text{HMe}_2$ -3,5); 3.79 (merged with  $\text{CH-CHMe}_2$  signal arising from isomer **4a**,  $\text{CH-CHMe}_2$ ); 2.61 (s, 5- $\text{CH}_3$ - $\text{N}_2\text{C}_3\text{HMe}_2$ -3,5); 2.30 (s, 3- $\text{CH}_3$ - $\text{N}_2\text{C}_3\text{HMe}_2$ -3,5); 1.37 (d,  $^3\text{J}(\text{H,H}) = 6.4$  Hz,  $\text{CH}_3$ - $\text{CHMe}_2$ ); 0.97 (d,  $^3\text{J}(\text{H,H}) = 6.4$  Hz,  $\text{CH}_3$ - $\text{CHMe}_2$ ).  $^{13}\text{C}$  NMR (100.6 MHz,  $\text{CDCl}_3$ ):  $\delta$  110.4 (merged with  $\text{CH-N}_2\text{C}_3\text{HMe}_2$ -3,5 signal arising from isomer **4a**,  $\text{CH-N}_2\text{C}_3\text{HMe}_2$ -3,5); 53.2 (merged with  $\text{CH-CHMe}_2$  signal arising from isomer **4a**,  $\text{CH-CHMe}_2$ ); 26.0 (d,  $^3\text{J}(\text{C,P}) = 9.3$  Hz,  $\text{CH}_3$ - $\text{CHMe}_2$ ); 24.6 (d,  $^3\text{J}(\text{C,P}) = 16.2$  Hz,  $\text{CH}_3$ - $\text{CHMe}_2$ ); 16.1 (s,  $\text{CH}_3$ - $\text{N}_2\text{C}_3\text{HMe}_2$ -3,5); 13.9 (d,  $^3\text{J}(\text{C,P}) = 6.5$ ,  $\text{CH}_3$ - $\text{N}_2\text{C}_3\text{HMe}_2$ -3,5).

*Endo-* (**5a**)  $^1\text{H}$  NMR (400 MHz,  $\text{CDCl}_3$ ):  $\delta$  7.79 – 6.65 (m, aryl protons); 6.24 (d,  $^4\text{J}(\text{H,P}) = 2.2$  Hz,  $\text{CH-N}_2\text{C}_3\text{HMe}_2$ -3,5); 4.66 (m,  $\text{CH-}^*\text{CHMePh}$ ); 2.77 (s, 5- $\text{CH}_3$ - $\text{N}_2\text{C}_3\text{HMe}_2$ -3,5); 1.84 (d,

$^3J(\text{H,H}) = 6.3$  Hz,  $\text{CH}_3\text{-*CHMePh}$ ); 1.78 (s, 3- $\text{CH}_3\text{-N}_2\text{C}_3\text{HMe}_2\text{-3,5}$ ).  $^{13}\text{C}$  NMR (100.6 MHz,  $\text{CDCl}_3$ ):  $\delta$  158.4 – 127.2 (m, aryl carbons); 110.5 (s,  $\text{CH-N}_2\text{C}_3\text{HMe}_2\text{-3,5}$ ); 61.1 (dd,  $^2J(\text{C,P}) = 24.0$  and 6.8 Hz,  $\text{CH-*CHMePh}$ ); 25.1 (d,  $^3J(\text{C,P}) = 21.6$  Hz,  $\text{CH}_3\text{-*CHMePh}$ ); 15.8 (s,  $\text{CH}_3\text{-N}_2\text{C}_3\text{HMe}_2\text{-3,5}$ ); 14.0 (d,  $^3J(\text{C,P}) = 18.1$  Hz,  $\text{CH}_3\text{-N}_2\text{C}_3\text{HMe}_2\text{-3,5}$ ).

*Exo-* (**5b**)  $^1\text{H}$  NMR (400 MHz,  $\text{CDCl}_3$ ):  $\delta$  6.31 (d,  $^4J(\text{H,P}) = 2.5$  Hz,  $\text{CH-N}_2\text{C}_3\text{HMe}_2\text{-3,5}$ ); 4.66 (merged with  $\text{CH-*CHMePh}$  signal arising from isomer **5a**,  $\text{CH-*CHMePh}$ ); 2.73 (s, 5- $\text{CH}_3\text{-N}_2\text{C}_3\text{HMe}_2\text{-3,5}$ ); 2.03 (s, 3- $\text{CH}_3\text{-N}_2\text{C}_3\text{HMe}_2\text{-3,5}$ ); 1.69 (d,  $^3J(\text{H,H}) = 6.1$  Hz,  $\text{CH}_3\text{-*CHMePh}$ ).  $^{13}\text{C}$  NMR (100.6 MHz,  $\text{CDCl}_3$ ):  $\delta$  110.6 (s,  $\text{CH-N}_2\text{C}_3\text{HMe}_2\text{-3,5}$ ); 60.7 (dd,  $^2J(\text{C,P}) = 23.4$  and 6.8 Hz,  $\text{CH-*CHMePh}$ ); 25.0 (d,  $^3J(\text{C,P}) = 20.9$  Hz,  $\text{CH}_3\text{-*CHMePh}$ ); 15.8 (merged with  $\text{CH}_3\text{-N}_2\text{C}_3\text{HMe}_2\text{-3,5}$  signal arising from isomer **5a**,  $\text{CH}_3\text{-N}_2\text{C}_3\text{HMe}_2\text{-3,5}$ ); 14.0 (merged with  $\text{CH}_3\text{-N}_2\text{C}_3\text{HMe}_2\text{-3,5}$  signal arising from isomer **5a**,  $\text{CH}_3\text{-N}_2\text{C}_3\text{HMe}_2\text{-3,5}$ ).

*Endo, syn/syn-* (**6a**)  $^1\text{H}$  NMR (400 MHz,  $\text{CD}_3\text{COCD}_3$ ):  $\delta$  7.90 – 7.01 (m, aryl protons); 6.52 (br.d,  $\text{CH-N}_2\text{C}_3\text{HMe}_2\text{-3,5}$ ); 3.89 (m,  $\text{CH-CHMe}_2$ ); 2.90 (s, 5- $\text{CH}_3\text{-N}_2\text{C}_3\text{HMe}_2\text{-3,5}$ ); 1.89 (s, 3- $\text{CH}_3\text{-N}_2\text{C}_3\text{HMe}_2\text{-3,5}$ ); 1.58 (d,  $^3J(\text{H,H}) = 6.6$  Hz,  $\text{CH}_3\text{-CHMe}_2$ ); 0.96 (d,  $^3J(\text{H,H}) = 6.4$  Hz,  $\text{CH}_3\text{-CHMe}_2$ ).  $^{13}\text{C}$  NMR (100.6 MHz, 1:1 mixture of  $\text{CDCl}_3$  and  $\text{CH}_2\text{Cl}_2$ ):  $\delta$  158.5 – 129.7 (m, aryl carbons); 110.4 (s,  $\text{CH-N}_2\text{C}_3\text{HMe}_2\text{-3,5}$ ); 64.9 (br.s,  $\text{CH-CHMe}_2$ ); 25.6 – 13.1 (methyl carbon resonances).

*Exo, syn/syn-* (**6b**)  $^1\text{H}$  NMR (400 MHz,  $\text{CD}_3\text{COCD}_3$ ):  $\delta$  6.38 (br.d,  $\text{CH-N}_2\text{C}_3\text{HMe}_2\text{-3,5}$ ); 3.89 (merged with  $\text{CH-CHMe}_2$  signal arising from isomer **6a**,  $\text{CH-CHMe}_2$ ); 2.71 (s, 5- $\text{CH}_3\text{-N}_2\text{C}_3\text{HMe}_2\text{-3,5}$ ); 1.89 (s, 3- $\text{CH}_3\text{-N}_2\text{C}_3\text{HMe}_2\text{-3,5}$ ); 1.58 (d,  $^3J(\text{H,H}) = 6.6$  Hz,  $\text{CH}_3\text{-CHMe}_2$ ); 0.96 (d,  $^3J(\text{H,H}) = 6.4$  Hz,  $\text{CH}_3\text{-CHMe}_2$ ).

$\text{N}_2\text{C}_3\text{HMe}_2\text{-3,5}$ ); 2.61 (s, 3- $\text{CH}_3\text{-N}_2\text{C}_3\text{HMe}_2\text{-3,5}$ ); 1.69 (d,  $^3\text{J}(\text{H,H}) = 6.4$  Hz,  $\text{CH}_3\text{-CHMe}_2$ ); 0.82 (d,  $^3\text{J}(\text{H,H}) = 6.4$  Hz,  $\text{CH}_3\text{-CHMe}_2$ ).

*Exo, anti/syn-* (**6c**)  $^1\text{H}$  NMR (400 MHz,  $\text{CD}_3\text{COCD}_3$ ):  $\delta$  6.53 (br.s,  $\text{CH-N}_2\text{C}_3\text{HMe}_2\text{-3,5}$ ); 3.89 (merged with  $\text{CH-CHMe}_2$  signal arising from isomer **6a**,  $\text{CH-CHMe}_2$ ); 2.92 (s, 5- $\text{CH}_3\text{-N}_2\text{C}_3\text{HMe}_2\text{-3,5}$ ); 2.61 (s, 3- $\text{CH}_3\text{-N}_2\text{C}_3\text{HMe}_2\text{-3,5}$ ); 1.80 (d,  $^3\text{J}(\text{H,H}) = 6.4$  Hz,  $\text{CH}_3\text{-CHMe}_2$ ); 0.63 (d,  $^3\text{J}(\text{H,H}) = 6.4$  Hz,  $\text{CH}_3\text{-CHMe}_2$ ).

*Endo, anti/syn-* (**6d**)  $^1\text{H}$  NMR (400 MHz,  $\text{CD}_3\text{COCD}_3$ ):  $\delta$  6.43 (br.s,  $\text{CH-N}_2\text{C}_3\text{HMe}_2\text{-3,5}$ ); 3.89 (merged with  $\text{CH-CHMe}_2$  signal arising from isomer **6a**,  $\text{CH-CHMe}_2$ ); 2.68 (s, 5- $\text{CH}_3\text{-N}_2\text{C}_3\text{HMe}_2\text{-3,5}$ ); 2.53 (s, 3- $\text{CH}_3\text{-N}_2\text{C}_3\text{HMe}_2\text{-3,5}$ ); 1.42 (d,  $^3\text{J}(\text{H,H}) = 6.4$  Hz,  $\text{CH}_3\text{-CHMe}_2$ ); 1.05 (d,  $^3\text{J}(\text{H,H}) = 6.3$  Hz,  $\text{CH}_3\text{-CHMe}_2$ ).

*Endo, syn/syn-* (**7a**)  $^1\text{H}$  NMR (500 MHz,  $\text{CDCl}_3$ ):  $\delta$  7.70 – 6.60 (m, aryl protons); 6.20 (br.s,  $\text{CH-N}_2\text{C}_3\text{HMe}_2\text{-3,5}$ ); 4.65 (m,  $\text{CH-}^*\text{CHMePh}$ ); 2.80 (s, 5- $\text{CH}_3\text{-N}_2\text{C}_3\text{HMe}_2\text{-3,5}$ ); 1.94 (d,  $^3\text{J}(\text{H,H}) = 6.8$  Hz,  $\text{CH}_3\text{-}^*\text{CHMePh}$ ); 1.69 (s, 3- $\text{CH}_3\text{-N}_2\text{C}_3\text{HMe}_2\text{-3,5}$ ).  $^{13}\text{C}$  NMR (125.7 MHz,  $\text{CDCl}_3$ ):  $\delta$  160.0 – 125.1 (aryl carbons); 110.4 (s,  $\text{CH-N}_2\text{C}_3\text{HMe}_2\text{-3,5}$ ); 60.6 (dd,  $^2\text{J}(\text{C,P}) = 24.8$  and 6.7 Hz,  $\text{CH-}^*\text{CHMePh}$ ); 25.4 (d,  $^3\text{J}(\text{C,P}) = 22.6$  Hz,  $\text{CH}_3\text{-}^*\text{CHMePh}$ ); 18.5 (d,  $^3\text{J}(\text{C,P}) = 4.0$  Hz,  $\text{CH}_3\text{-allyl trans}$  to the coordinated phosphorus centre); 17.9 (s,  $\text{CH}_3\text{-allyl cis}$  to the coordinated phosphorus centre); 14.7 (s,  $\text{CH}_3\text{-N}_2\text{C}_3\text{HMe}_2\text{-3,5}$ ); 13.7 (d,  $^3\text{J}(\text{C,P}) = 17.6$  Hz,  $\text{CH}_3\text{-N}_2\text{C}_3\text{HMe}_2\text{-3,5}$ ).

*Exo, syn/syn-* (**7b**)  $^1\text{H}$  NMR (500 MHz,  $\text{CDCl}_3$ ):  $\delta$  6.31 (br.s,  $\text{CH-N}_2\text{C}_3\text{HMe}_2\text{-3,5}$ ); 4.65 (merged with  $\text{CH-}^*\text{CHMePh}$  signal arising from isomer **7a**,  $\text{CH-}^*\text{CHMePh}$ ); 2.67 (s, 5- $\text{CH}_3\text{-N}_2\text{C}_3\text{HMe}_2\text{-3,5}$ ).

3,5); 2.30 (s, 3-CH<sub>3</sub>-N<sub>2</sub>C<sub>3</sub>HMe<sub>2</sub>-3,5); 1.45 (merged with CH<sub>3</sub>-\*CHMePh signal arising from isomer **7a**, CH<sub>3</sub>-\*CHMePh). <sup>13</sup>C NMR (125.7 MHz, CDCl<sub>3</sub>): δ 110.7 (s, CH-N<sub>2</sub>C<sub>3</sub>HMe<sub>2</sub>-3,5); 61.3 (dd, CH-\*CHMePh); 25.3 (merged with CH<sub>3</sub>-\*CHMePh signal arising from isomer **7a**, CH<sub>3</sub>-\*CHMePh); 17.9 (br.s, CH<sub>3</sub>-allyl *trans* to the coordinated phosphorus centre); 16.1 (s, CH<sub>3</sub>-allyl *cis* to the coordinated phosphorus centre); 15.1 (s, CH<sub>3</sub>-N<sub>2</sub>C<sub>3</sub>HMe<sub>2</sub>-3,5).

*Exo, anti/syn-* (**7c**) <sup>1</sup>H NMR (500 MHz, CDCl<sub>3</sub>): δ 6.31 (merged with CH-N<sub>2</sub>C<sub>3</sub>HMe<sub>2</sub>-3,5 signal arising from isomer **7b**, CH-N<sub>2</sub>C<sub>3</sub>HMe<sub>2</sub>-3,5); 4.65 (merged with CH-\*CHMePh signal arising from isomer **7a**, CH-\*CHMePh); 2.76 (s, 5-CH<sub>3</sub>-N<sub>2</sub>C<sub>3</sub>HMe<sub>2</sub>-3,5); 2.05 (s, 3-CH<sub>3</sub>-N<sub>2</sub>C<sub>3</sub>HMe<sub>2</sub>-3,5); 1.80 (d, <sup>3</sup>J(H,H) = 6.9 Hz, CH<sub>3</sub>-\*CHMePh).

*Endo, anti/syn-* (**7d**) <sup>1</sup>H NMR (500 MHz, CDCl<sub>3</sub>): δ 6.42 (br.s, CH-N<sub>2</sub>C<sub>3</sub>HMe<sub>2</sub>-3,5); 4.65 (merged with CH-\*CHMePh signal arising from isomer **7a**, CH-\*CHMePh); 2.67 (merged with 5-CH<sub>3</sub>-N<sub>2</sub>C<sub>3</sub>HMe<sub>2</sub>-3,5 signal arising from isomer **7b**, 5-CH<sub>3</sub>-N<sub>2</sub>C<sub>3</sub>HMe<sub>2</sub>-3,5); 2.33 (s, 3-CH<sub>3</sub>-N<sub>2</sub>C<sub>3</sub>HMe<sub>2</sub>-3,5); 1.80 (merged with CH<sub>3</sub>-\*CHMePh signal arising from isomer **7c**, CH<sub>3</sub>-\*CHMePh).

*Endo, syn/syn-* (**8a**) <sup>1</sup>H NMR (400 MHz, CDCl<sub>3</sub>): δ 8.08 – 6.58 (m, aryl protons); 6.00 (d, <sup>4</sup>J(H,P) = 1.7 Hz, CH-N<sub>2</sub>C<sub>3</sub>HMe<sub>2</sub>-3,5); 3.55 (m, CH-CHMe<sub>2</sub>); 2.61 (s, 5-CH<sub>3</sub>-N<sub>2</sub>C<sub>3</sub>HMe<sub>2</sub>-3,5); 1.28 (d, <sup>3</sup>J(H,H) = 6.5 Hz, CH<sub>3</sub>-CHMe<sub>2</sub>); 0.99 (s, 3-CH<sub>3</sub>-N<sub>2</sub>C<sub>3</sub>HMe<sub>2</sub>-3,5); 0.92 (d, <sup>3</sup>J(H,H) = 6.4 Hz, CH<sub>3</sub>-CHMe<sub>2</sub>). <sup>13</sup>C NMR (100.6 MHz, CDCl<sub>3</sub>): δ 159.0 – 125.6 (aryl carbons); 110.0 (s, CH-N<sub>2</sub>C<sub>3</sub>HMe<sub>2</sub>-3,5); 53.6 (dd, <sup>2</sup>J(C,P) = 28.6 and 6.1 Hz, CH-CHMe<sub>2</sub>); 25.9 (d, <sup>3</sup>J(C,P) = 7.4 Hz,

CH<sub>3</sub>-CHMe<sub>2</sub>); 25.1 (d, <sup>3</sup>J(C,P) = 20.5 Hz, CH<sub>3</sub>-CHMe<sub>2</sub>); 13.9 (s, CH<sub>3</sub>-N<sub>2</sub>C<sub>3</sub>HMe<sub>2</sub>-3,5); 13.7 (s, CH<sub>3</sub>-N<sub>2</sub>C<sub>3</sub>HMe<sub>2</sub>-3,5).

*Endo, syn/syn-* (**8b**) <sup>1</sup>H NMR (400 MHz, CDCl<sub>3</sub>): δ 5.89 (br.s, CH-N<sub>2</sub>C<sub>3</sub>HMe<sub>2</sub>-3,5); 3.99 (m, CH-CHMe<sub>2</sub>); 2.32 (s, 5-CH<sub>3</sub>-N<sub>2</sub>C<sub>3</sub>HMe<sub>2</sub>-3,5); 1.22 (s, 3-CH<sub>3</sub>-N<sub>2</sub>C<sub>3</sub>HMe<sub>2</sub>-3,5); 1.00 (merged with 3-CH<sub>3</sub>-N<sub>2</sub>C<sub>3</sub>HMe<sub>2</sub>-3,5 signal arising from isomer **8a**, CH<sub>3</sub>-CHMe<sub>2</sub>); 0.12 (d, <sup>3</sup>J(H,H) = 6.8 Hz, CH<sub>3</sub>-CHMe<sub>2</sub>). <sup>13</sup>C NMR (100.6 MHz, CDCl<sub>3</sub>): δ 110.9 (s, CH-N<sub>2</sub>C<sub>3</sub>HMe<sub>2</sub>-3,5); 56.7 (d, <sup>2</sup>J(C,P) = 20.9 Hz, CH-CHMe<sub>2</sub>); 23.3 (br.s, CH<sub>3</sub>-CHMe<sub>2</sub>); 14.5 (d, <sup>3</sup>J(C,P) = 13.8 Hz, CH<sub>3</sub>-N<sub>2</sub>C<sub>3</sub>HMe<sub>2</sub>-3,5); 11.7 (d, <sup>4</sup>J(C,P) = 6.9 Hz, CH<sub>3</sub>-N<sub>2</sub>C<sub>3</sub>HMe<sub>2</sub>-3,5).

*Exo, syn/syn-* (**8c**) <sup>1</sup>H NMR (400 MHz, CDCl<sub>3</sub>): δ 6.10 (br.s, CH-N<sub>2</sub>C<sub>3</sub>HMe<sub>2</sub>-3,5); 3.89 (m, CH-CHMe<sub>2</sub>); 2.43 (s, 5-CH<sub>3</sub>-N<sub>2</sub>C<sub>3</sub>HMe<sub>2</sub>-3,5); 2.27 (s, 3-CH<sub>3</sub>-N<sub>2</sub>C<sub>3</sub>HMe<sub>2</sub>-3,5); 0.84 (d, <sup>3</sup>J(H,H) = 6.7 Hz, CH<sub>3</sub>-CHMe<sub>2</sub>); 0.32 (d, <sup>3</sup>J(H,H) = 6.6 Hz, CH<sub>3</sub>-CHMe<sub>2</sub>).

*Endo, syn/syn-* (**9**) <sup>1</sup>H NMR (400 MHz, CDCl<sub>3</sub>): δ 7.68 – 6.46 (m, aryl protons); 6.01 (br.s, CH-N<sub>2</sub>C<sub>3</sub>HMe<sub>2</sub>-3,5); 4.45 (m, CH-\*CHMePh); 2.76 (s, 5-CH<sub>3</sub>-N<sub>2</sub>C<sub>3</sub>HMe<sub>2</sub>-3,5); 1.81 (d, <sup>3</sup>J(H,H) = 6.8 Hz, CH<sub>3</sub>-\*CHMePh); 0.79 (s, 3-CH<sub>3</sub>-N<sub>2</sub>C<sub>3</sub>HMe<sub>2</sub>-3,5). <sup>13</sup>C NMR (100.6 MHz, CDCl<sub>3</sub>): δ 159.1 – 124.3 (aryl carbons); 110.8 (s, CH-N<sub>2</sub>C<sub>3</sub>HMe<sub>2</sub>-3,5); 60.9 (dd, <sup>2</sup>J(C,P) = 24.6 and 6.7 Hz, CH-\*CHMePh); 25.4 (d, <sup>3</sup>J(C,P) = 22.4 Hz, CH<sub>3</sub>-\*CHMePh); 14.1 (d, <sup>3</sup>J(C,P) = 18.2 Hz, CH<sub>3</sub>-N<sub>2</sub>C<sub>3</sub>HMe<sub>2</sub>-3,5); 13.5 (s, CH<sub>3</sub>-N<sub>2</sub>C<sub>3</sub>HMe<sub>2</sub>-3,5).

*Endo, syn/syn-* (**10**) <sup>1</sup>H NMR (400 MHz, CDCl<sub>3</sub>): δ 7.90 – 6.94 (m, aryl protons); 5.77 (d, <sup>4</sup>J(H,P) = 2.2 Hz, CH-N<sub>2</sub>C<sub>3</sub>HMe<sub>2</sub>-3,5); 4.46 (m, CH-\*CHMePh); 1.91 (s, 5-CH<sub>3</sub>-N<sub>2</sub>C<sub>3</sub>HMe<sub>2</sub>-3,5); 1.22 (d, <sup>3</sup>J(H,H) = 6.8 Hz, CH<sub>3</sub>-\*CHMePh); 0.65 (s, 3-CH<sub>3</sub>-N<sub>2</sub>C<sub>3</sub>HMe<sub>2</sub>-3,5). <sup>13</sup>C NMR (100.6

MHz, CDCl<sub>3</sub>):  $\delta$  158.5 – 127.5 (aryl carbons); 109.7 (br.s, CH-N<sub>2</sub>C<sub>3</sub>HMe<sub>2</sub>-3,5); 60.4 (dd, <sup>2</sup>J(C,P) = 28.2 and 6.0 Hz, CH-\*CHMePh); 23.8 (d, <sup>3</sup>J(C,P) = 10.0 Hz, CH<sub>3</sub>-\*CHMePh); 13.1 (s, CH<sub>3</sub>-N<sub>2</sub>C<sub>3</sub>HMe<sub>2</sub>-3,5); 12.4 (d, <sup>3</sup>J(C,P) = 16.1 Hz, CH<sub>3</sub>-N<sub>2</sub>C<sub>3</sub>HMe<sub>2</sub>-3,5).

*Endo* (**11a**) <sup>1</sup>H NMR (400 MHz, CDCl<sub>3</sub>):  $\delta$  7.99 – 7.24 (m, aryl protons); 6.15 (br.s, CH-N<sub>2</sub>C<sub>3</sub>HMe<sub>2</sub>-3,5); 4.70 (m, CH-CHMe<sub>2</sub>); 2.40 (s, 3-CH<sub>3</sub>-N<sub>2</sub>C<sub>3</sub>HMe<sub>2</sub>-3,5); 1.87 (s, 5-CH<sub>3</sub>-N<sub>2</sub>C<sub>3</sub>HMe<sub>2</sub>-3,5); 1.13 (d, <sup>3</sup>J(H,H) = 6.7 Hz, CH<sub>3</sub>-CHMe<sub>2</sub>); 0.44 (d, <sup>3</sup>J(H,H) = 6.9 Hz, CH<sub>3</sub>-CHMe<sub>2</sub>). <sup>13</sup>C NMR (100.6 MHz, CDCl<sub>3</sub>):  $\delta$  157.7 – 126.9 (aryl carbons); 110.8 (s, CH-N<sub>2</sub>C<sub>3</sub>HMe<sub>2</sub>-3,5); 57.6 (s, CH-CHMe<sub>2</sub>), 23.3 (s, CH<sub>3</sub>-CHMe<sub>2</sub>), 23.1 (s, CH<sub>3</sub>-CHMe<sub>2</sub>); 13.8 (s, CH<sub>3</sub>-N<sub>2</sub>C<sub>3</sub>HMe<sub>2</sub>-3,5); 13.7 (s, CH<sub>3</sub>-N<sub>2</sub>C<sub>3</sub>HMe<sub>2</sub>-3,5).

*Exo*- (**11b**): <sup>1</sup>H NMR (400 MHz, CDCl<sub>3</sub>):  $\delta$  6.15 (merged with CH-N<sub>2</sub>C<sub>3</sub>HMe<sub>2</sub>-3,5 signal arising from isomer **11a**, CH-N<sub>2</sub>C<sub>3</sub>HMe<sub>2</sub>-3,5); 4.70 (merged with CH-CHMe<sub>2</sub> signal arising from isomer **11a**, CH-CHMe<sub>2</sub>); 2.40 (merged with 3-CH<sub>3</sub>-N<sub>2</sub>C<sub>3</sub>HMe<sub>2</sub>-3,5 signal arising from isomer **11a**, 3-CH<sub>3</sub>-N<sub>2</sub>C<sub>3</sub>HMe<sub>2</sub>-3,5); 2.19 (br.s, 5-CH<sub>3</sub>-N<sub>2</sub>C<sub>3</sub>HMe<sub>2</sub>-3,5); 1.07 (br.d, CH<sub>3</sub>-CHMe<sub>2</sub>); 0.44 (merged with CH<sub>3</sub>-CHMe<sub>2</sub> signal arising from isomer **11a**, CH<sub>3</sub>-CHMe<sub>2</sub>). <sup>13</sup>C NMR (100.6 MHz, CDCl<sub>3</sub>):  $\delta$  110.8 (merged with CH-N<sub>2</sub>C<sub>3</sub>HMe<sub>2</sub>-3,5 signal arising from isomer **11a**, CH-N<sub>2</sub>C<sub>3</sub>HMe<sub>2</sub>-3,5); 57.6 (merged with CH-CHMe<sub>2</sub> signal arising from isomer **11a**, CH-CHMe<sub>2</sub>); 23.3 (s, CH<sub>3</sub>-CHMe<sub>2</sub>); 23.1 (s, CH<sub>3</sub>-CHMe<sub>2</sub>); 13.8 (merged with CH<sub>3</sub>-N<sub>2</sub>C<sub>3</sub>HMe<sub>2</sub>-3,5 signal arising from isomer **11a**, CH<sub>3</sub>-N<sub>2</sub>C<sub>3</sub>HMe<sub>2</sub>-3,5).

*Exo, syn/syn*- (**12a**) <sup>1</sup>H NMR (500 MHz, CDCl<sub>3</sub>):  $\delta$  8.11 – 7.05 (m, aryl protons), 6.21 (br.s, CH-N<sub>2</sub>C<sub>3</sub>HMe<sub>2</sub>-3,5); 5 4.65 (m, CH-CHMe<sub>2</sub>); 2.40 (s, 3-CH<sub>3</sub>-N<sub>2</sub>C<sub>3</sub>HMe<sub>2</sub>-3,5); 2.12 (s, 5-CH<sub>3</sub>-

$\text{N}_2\text{C}_3\text{HMe}_2\text{-3,5}$ ); 1.12 (d,  $^3\text{J}(\text{H,H}) = 6.1$  Hz,  $\text{CH}_3\text{-CHMe}_2$ ); 0.45 (d,  $^3\text{J}(\text{H,H}) = 6.9$  Hz,  $\text{CH}_3\text{-CHMe}_2$ ).  $^{13}\text{C}$  NMR (125.7 MHz,  $\text{CDCl}_3$ ):  $\delta$  156.1-129.3 (aryl carbons); 110.7 (br.s,  $\text{CH-N}_2\text{C}_3\text{HMe}_2\text{-3,5}$ ); 57.8 (dd,  $^2\text{J}(\text{C,P}) = 20.1$  and 4.0 Hz,  $\text{CH-CHMe}_2$ ); 23.6 (s,  $\text{CH}_3\text{-CHMe}_2$ ), 23.3 (s,  $\text{CH}_3\text{-CHMe}_2$ ); 18.3 (d,  $^3\text{J}(\text{C,P}) = 13.3$  Hz,  $\text{CH}_3\text{-allyl trans}$  to the coordinated phosphorus centre); 17.5 (s,  $\text{CH}_3\text{-allyl cis}$  to the coordinated phosphorus centre); 14.0 (s,  $\text{CH}_3\text{-N}_2\text{C}_3\text{HMe}_2\text{-3,5}$ ); 13.8 (s,  $\text{CH}_3\text{-N}_2\text{C}_3\text{HMe}_2\text{-3,5}$ ).

*Endo, syn/syn-* (**12b**)  $^1\text{H}$  NMR (500 MHz,  $\text{CDCl}_3$ ):  $\delta$  6.19 (br.d,  $\text{CH-N}_2\text{C}_3\text{HMe}_2\text{-3,5}$ ); 4.65 (merged with  $\text{CH-CHMe}_2$  signal arising from isomer **12a**,  $\text{CH-CHMe}_2$ ); 2.38 (s, 3- $\text{CH}_3\text{-N}_2\text{C}_3\text{HMe}_2\text{-3,5}$ ); 2.16 (s, 5- $\text{CH}_3\text{-N}_2\text{C}_3\text{HMe}_2\text{-3,5}$ ); 1.11 (d,  $^3\text{J}(\text{H,H}) = 6.1$  Hz,  $\text{CH}_3\text{-CHMe}_2$ ); 0.37 (d,  $^3\text{J}(\text{H,H}) = 6.9$  Hz,  $\text{CH}_3\text{-CHMe}_2$ ).  $^{13}\text{C}$  NMR (125.7 MHz,  $\text{CDCl}_3$ ):  $\delta$  18.3 (d,  $^3\text{J}(\text{C,P}) = 13.8$  Hz,  $\text{CH}_3\text{-allyl trans}$  to the coordinated phosphorus centre); 17.4 (s,  $\text{CH}_3\text{-allyl cis}$  to the coordinated phosphorus centre).

*Endo, anti/syn-* (**12c**)  $^1\text{H}$  NMR (500 MHz,  $\text{CDCl}_3$ ):  $\delta$  6.19 (merged with  $\text{CH-N}_2\text{C}_3\text{HMe}_2\text{-3,5}$  signal arising from isomer **12b**,  $\text{CH-N}_2\text{C}_3\text{HMe}_2\text{-3,5}$ ); 4.65 (merged with  $\text{CH-CHMe}_2$  signal arising from isomer **12a**,  $\text{CH-CHMe}_2$ ); 2.37 (s, 3- $\text{CH}_3\text{-N}_2\text{C}_3\text{HMe}_2\text{-3,5}$ ); 1.89 (s, 5- $\text{CH}_3\text{-N}_2\text{C}_3\text{HMe}_2\text{-3,5}$ ); 1.12 (merged with  $\text{CH}_3\text{-CHMe}_2$  signal arising from isomer **12a**,  $\text{CH}_3\text{-CHMe}_2$ ); 0.51 (d,  $^3\text{J}(\text{H,H}) = 7.0$  Hz,  $\text{CH}_3\text{-CHMe}_2$ ).

*Exo, syn/syn-* (**13a**)  $^1\text{H}$  NMR (400 MHz,  $\text{CDCl}_3$ ):  $\delta$  6.16 (d,  $^4\text{J}(\text{H,P}) = 2.6$  Hz,  $\text{CH-N}_2\text{C}_3\text{HMe}_2\text{-3,5}$ ); 4.41 (m,  $\text{CH-CHMe}_2$ ); 2.44 (s, 3- $\text{CH}_3\text{-N}_2\text{C}_3\text{HMe}_2\text{-3,5}$ ); 2.31 (s, 5- $\text{CH}_3\text{-N}_2\text{C}_3\text{HMe}_2\text{-3,5}$ ); 0.98 (d,  $^3\text{J}(\text{H,H}) = 6.8$  Hz,  $\text{CH}_3\text{-CHMe}_2$ ); 0.29 (d,  $^3\text{J}(\text{H,H}) = 6.6$  Hz,  $\text{CH}_3\text{-CHMe}_2$ ).  $^{13}\text{C}$  NMR



(100.6 MHz, 1:1 mixture of CDCl<sub>3</sub> and CH<sub>2</sub>Cl<sub>2</sub>):  $\delta$  110.9 (br.s, CH-N<sub>2</sub>C<sub>3</sub>HMe<sub>2</sub>-3,5); 58.3 (br.d, CH-CHMe<sub>2</sub>, <sup>2</sup>J(C,P) = 20.1 and 4.0 Hz); 22.8 (s, CH<sub>3</sub>-CHMe<sub>2</sub>); 22.6 (s, CH<sub>3</sub>-CHMe<sub>2</sub>); 14.2 (s, CH<sub>3</sub>-N<sub>2</sub>C<sub>3</sub>HMe<sub>2</sub>-3,5); 13.5 (s, CH<sub>3</sub>-N<sub>2</sub>C<sub>3</sub>HMe<sub>2</sub>-3,5).

*Endo, syn/syn-* (**13b**) <sup>1</sup>H NMR (400 MHz, CDCl<sub>3</sub>):  $\delta$  8.05 – 6.70 (m, aryl protons); 5.88 (d, <sup>4</sup>J(H,P) = 2.8 Hz, CH-N<sub>2</sub>C<sub>3</sub>HMe<sub>2</sub>-3,5); 4.41 (merged with CH-CHMe<sub>2</sub> signal arising from isomer **13a**, CH-CHMe<sub>2</sub>); 2.28 (s, 3-CH<sub>3</sub>-N<sub>2</sub>C<sub>3</sub>HMe<sub>2</sub>-3,5); 2.11 (s, 5-CH<sub>3</sub>-N<sub>2</sub>C<sub>3</sub>HMe<sub>2</sub>-3,5); 0.98 (merged with CH<sub>3</sub>-CHMe<sub>2</sub> signal arising from isomer **13a**, CH<sub>3</sub>-CHMe<sub>2</sub>); 0.29 (merged with CH<sub>3</sub>-CHMe<sub>2</sub> signal arising from isomer **13a**, CH<sub>3</sub>-CHMe<sub>2</sub>). <sup>13</sup>C NMR (100.6 MHz, 1:1 mixture of CDCl<sub>3</sub> and CH<sub>2</sub>Cl<sub>2</sub>):  $\delta$  148.3 – 126.2 (aryl carbons); 110.1 (br.s, CH-N<sub>2</sub>C<sub>3</sub>HMe<sub>2</sub>-3,5); 57.6 (br.d, CH-CHMe<sub>2</sub>); 23.0 (s, CH<sub>3</sub>-CHMe<sub>2</sub>); 22.9 (s, CH<sub>3</sub>-CHMe<sub>2</sub>); 14.4 (s, CH<sub>3</sub>-N<sub>2</sub>C<sub>3</sub>HMe<sub>2</sub>-3,5); 13.6 (s, CH<sub>3</sub>-N<sub>2</sub>C<sub>3</sub>HMe<sub>2</sub>-3,5).

Table E. S.1 : Selected  $^1\text{H}$  NMR data<sup>a</sup> for complexes **4 -13**

| Complex   | H <sub>s</sub>                                        | H <sub>a</sub>                                        | H <sub>s</sub> '                | H <sub>a</sub> '              | H <sub>c</sub>                                        | CH <sub>3</sub> <sup>b</sup>                         | CH <sub>3</sub> <sup>c</sup>                         |
|-----------|-------------------------------------------------------|-------------------------------------------------------|---------------------------------|-------------------------------|-------------------------------------------------------|------------------------------------------------------|------------------------------------------------------|
| <b>4a</b> | 4.73 br t<br>(7.3) <sup>d</sup><br>(7.3) <sup>e</sup> | 2.16 dd<br>(13.8) <sup>d</sup><br>(11.0) <sup>e</sup> | 3.25 br d<br>(6.5) <sup>d</sup> | 1.63 <sup>f</sup>             | 5.58 m                                                | —                                                    | —                                                    |
| <b>4b</b> | 4.30 br t<br>(7.2) <sup>d</sup><br>(7.2) <sup>e</sup> | 3.55 dd<br>(13.0) <sup>d</sup><br>(10.5) <sup>e</sup> | 2.76 br                         | 2.79 br                       | 4.09 m                                                | —                                                    | —                                                    |
| <b>5a</b> | 4.60 <sup>f</sup>                                     | 2.07 dd<br>(13.6) <sup>d</sup><br>(10.5) <sup>e</sup> | 3.26d<br>(6.5) <sup>d</sup>     | 1.59 <sup>f</sup>             | 5.48<br>m                                             | —                                                    | —                                                    |
| <b>5b</b> | 4.15 br t<br>(7.1) <sup>d</sup><br>(7.1) <sup>e</sup> | 3.41dd<br>(13.3) <sup>d</sup><br>(10.8) <sup>e</sup>  | 2.99d<br>(6.7) <sup>d</sup>     | 2.68 d<br>(12.4) <sup>d</sup> | 4.06<br>m                                             | —                                                    | —                                                    |
| <b>6a</b> | —                                                     | 2.95 m                                                | —                               | 2.7 m                         | 5.57 dd<br>(12.7) <sup>d</sup><br>(10.8) <sup>d</sup> | 1.55 dd<br>(11.2) <sup>e</sup><br>(6.4) <sup>d</sup> | 0.94 dd<br>(10.2) <sup>e</sup><br>(6.5) <sup>d</sup> |
| <b>6b</b> | —                                                     | 4.83 m                                                | —                               | 3.45 m                        | 3.89 t<br>(11.1) <sup>d</sup>                         | 1.51 dd<br>(11.1) <sup>e</sup><br>(6.4) <sup>d</sup> | 0.20 dd<br>(8.3) <sup>e</sup><br>(6.3) <sup>d</sup>  |
| <b>6c</b> | —                                                     | 5.02 m                                                | 3.79 m                          | —                             | 4.18 <sup>f</sup>                                     | 1.50 <sup>f</sup>                                    | 0.86 t<br>(7.3) <sup>d</sup><br>(7.3) <sup>e</sup>   |
| <b>6d</b> | —                                                     | (-) <sup>g</sup>                                      | 3.55                            | —                             | 5.60 m                                                | (-) <sup>g</sup>                                     | -0.34 t<br>(7.3) <sup>d</sup><br>(7.3) <sup>e</sup>  |
| <b>7a</b> | —                                                     | 2.65 m                                                | —                               | 2.50 m                        | 5.22 dd<br>(12.7) <sup>d</sup><br>(10.7) <sup>d</sup> | 1.45 <sup>f</sup>                                    | 0.85 dd<br>(10.3) <sup>e</sup><br>(6.3) <sup>d</sup> |
| <b>7b</b> | —                                                     | 4.43                                                  | —                               | 3.25 m                        | 3.86 t<br>(11.5) <sup>d</sup>                         | 1.46 dd<br>(10.5) <sup>e</sup><br>(6.5) <sup>d</sup> | 0.29 dd<br>(8.3) <sup>e</sup><br>(6.3) <sup>d</sup>  |

|            |                                |                                                                           |                              |                                                                             |                                                       |                                                      |                                                      |
|------------|--------------------------------|---------------------------------------------------------------------------|------------------------------|-----------------------------------------------------------------------------|-------------------------------------------------------|------------------------------------------------------|------------------------------------------------------|
| <b>7c</b>  | –                              | 4.70 m                                                                    | 3.74 m                       | –                                                                           | 3.93 dd<br>(13.5) <sup>d</sup><br>(8.0) <sup>d</sup>  | 1.45 <sup>f</sup>                                    | 0.73 t<br>(7.1) <sup>d</sup><br>(7.1) <sup>e</sup>   |
| <b>7d</b>  | –                              | 3.80 m                                                                    | 3.30 m                       | –                                                                           | 5.33 dd<br>(12.2) <sup>d</sup><br>(7.8) <sup>d</sup>  | 1.74 dd<br>(11.0) <sup>e</sup><br>(6.3) <sup>d</sup> | -0.39 t<br>(7.2) <sup>d</sup><br>(7.2) <sup>e</sup>  |
| <b>8a</b>  | –                              | 4.28 t<br>(13.5) <sup>d</sup><br>(13.5) <sup>e</sup>                      | –                            | 3.46 d<br>(10.8) <sup>d</sup>                                               | 6.29 dd<br>(13.5) <sup>d</sup><br>(10.8) <sup>d</sup> | –                                                    | –                                                    |
| <b>8b</b>  | –                              | 6.11 <sup>f</sup>                                                         | –                            | 5.57 dt<br>(13.3) <sup>d</sup><br>(13.3) <sup>e</sup><br>(5.1) <sup>e</sup> | 6.48 t<br>(13.3) <sup>d</sup>                         | –                                                    | –                                                    |
| <b>8c</b>  | –                              | 5.28 dt<br>(9.2) <sup>d</sup><br>(9.2) <sup>e</sup><br>(5.4) <sup>e</sup> | –                            | 5.38 dt<br>(12.9) <sup>d</sup><br>(13.0) <sup>e</sup><br>(5.3) <sup>e</sup> | 6.79 dd<br>(12.9) <sup>d</sup><br>(9.2) <sup>d</sup>  | –                                                    | –                                                    |
| <b>9</b>   | –                              | 4.16 t<br>(12.8) <sup>d</sup><br>(12.8) <sup>e</sup>                      | –                            | 3.33 d<br>(9.6) <sup>d</sup>                                                | 6.26 dd<br>(13.4) <sup>d</sup><br>(10.8) <sup>d</sup> | –                                                    | –                                                    |
| <b>10</b>  | –                              | 4.19 t<br>(12.0) <sup>d</sup><br>(12.0) <sup>e</sup>                      | –                            | 3.56 d<br>(10.8) <sup>d</sup>                                               | 6.30 dd<br>(12.0) <sup>d</sup><br>(10.8) <sup>d</sup> | –                                                    | –                                                    |
| <b>11a</b> | 4.78 t<br>(6.2) <sup>d,e</sup> | 3.57 t<br>(12.7) <sup>d,e</sup>                                           | 4.23 d<br>(6.6) <sup>d</sup> | 2.56 d<br>(12.9) <sup>d</sup>                                               | 5.50 m                                                | –                                                    | –                                                    |
| <b>11b</b> | 4.88 br s                      | 3.57 <sup>f</sup>                                                         | 3.79 br s                    | 3.15 br d                                                                   | 5.50 <sup>f</sup>                                     | –                                                    | –                                                    |
| <b>12a</b> | –                              | 4.36 m                                                                    | –                            | 3.84 m                                                                      | 5.29 t<br>(12.0) <sup>d</sup>                         | 1.95 dd<br>(12.1) <sup>e</sup><br>(6.2) <sup>d</sup> | 0.93 dd<br>(9.8) <sup>e</sup><br>(6.5) <sup>d</sup>  |
| <b>12b</b> | –                              | 4.41 m                                                                    | –                            | 3.49 m                                                                      | 5.39 t<br>(12.0) <sup>d</sup>                         | 1.90 dd<br>(12.1) <sup>e</sup><br>(6.2) <sup>d</sup> | 1.30 dd<br>(10.2) <sup>e</sup><br>(6.5) <sup>d</sup> |
| <b>12c</b> | –                              | 4.75 m                                                                    | 4.75 <sup>f</sup>            | –                                                                           | 5.22 dd                                               | 1.99 <sup>f</sup>                                    | 0.31 t<br>(7.5) <sup>d,e</sup>                       |

---

|            |   |                                 |   |                                 |                               |   |   |
|------------|---|---------------------------------|---|---------------------------------|-------------------------------|---|---|
| <b>13a</b> | – | 5.80 t<br>(12.4) <sup>d,e</sup> | – | 4.97 t<br>(11.8) <sup>d,e</sup> | 6.62 t<br>(12.4) <sup>d</sup> | – | – |
| <b>13b</b> | – | 5.65 t<br>(12.4) <sup>d,e</sup> | – | 5.12 t<br>(12.4) <sup>d,e</sup> | 6.45 t<br>(12.4) <sup>d</sup> | – | – |

---

Abbreviations: s, singlet; br, broad; br s, broad singlet; d, doublet; t, triplet; dd, doublet of doublets; dt, doublet of triplets; m, multiplet.

<sup>a</sup> Solvent CDCl<sub>3</sub> for all the complexes except for complex **6** for which acetone-d<sub>6</sub> was used as solvent. Coupling constants in Hz are given in parenthesis. <sup>b</sup> Allyl CH<sub>3</sub> *trans* to the coordinated phosphorus centre. <sup>c</sup> CH<sub>3</sub>-allyl *cis* to the coordinated phosphorus centre. <sup>d</sup> J(H,H). <sup>e</sup> J(P,H). <sup>f</sup> Overlapped with signals arising from other allyl or ligand protons. <sup>g</sup> The signal could not be assigned unequivocally.

Table E. S .2: The  $^{13}\text{C}$  NMR data<sup>a</sup> for the allyl carbon nuclei of  $\eta^3$ -allyl palladium complexes(4-13)

| Complex               | $\delta(\text{C}_t)$                               | $\delta(\text{C}'_t)$                              | $\delta(\text{C}_t) - \delta(\text{C}'_t)$ | $\delta\text{C}_c$ |
|-----------------------|----------------------------------------------------|----------------------------------------------------|--------------------------------------------|--------------------|
| <b>4a</b>             | 80.3 d (31.7) <sup>b</sup>                         | 59.1 d (3.2) <sup>c</sup>                          | 21.2                                       | 119.9 d (6.3)      |
| <b>4b</b>             | 76.1 d (30.8) <sup>b</sup>                         | 61.5 d (3.1) <sup>c</sup>                          | 14.6                                       | 122.1 d (5.9)      |
| <b>5a</b>             | 80.0 d (32.3) <sup>b</sup>                         | 58.8 d (3.6) <sup>c</sup>                          | 21.2                                       | 119.5 d (6.5)      |
| <b>5b</b>             | 75.1 d (31.5) <sup>b</sup>                         | 61.4 d (3.6) <sup>c</sup>                          | 13.7                                       | 121.7 d (6.1)      |
| <b>6a</b>             | 103.3 d (26.2) <sup>b</sup>                        | 65.0 d (6.0) <sup>c</sup>                          | 38.3                                       | 119.6 d (6.0)      |
| <b>6b</b>             | 92.8 d (27.1) <sup>b</sup>                         | 68.8 d (4.0) <sup>c</sup>                          | 24.0                                       | 122.5 d (6.0)      |
| <b>7a</b>             | 103.3 d (27.4) <sup>b</sup>                        | 66.0 d (5.3) <sup>c</sup>                          | 37.3                                       | 120.0 d (5.9)      |
| <b>7b</b>             | 92.4 d (26.8) <sup>b</sup>                         | 69.9 d (5.2) <sup>c</sup>                          | 22.5                                       | 122.0 d (5.8)      |
| <b>7c</b>             | 90.5 d (26.2) <sup>b</sup>                         | 69.6 d (5.2) <sup>c</sup>                          | 20.9                                       | 116.8 d (5.9)      |
| <b>8a</b>             | 102.1 d (25.5) <sup>b</sup>                        | 72.2 d (6.2) <sup>c</sup>                          | 29.9                                       | 110.1 d (6.1)      |
| <b>8b<sup>d</sup></b> | 85.7 dd<br>(33.3) <sup>b</sup> (10.6) <sup>c</sup> | 95.0 dd<br>(29.7) <sup>b</sup> (11.2) <sup>c</sup> | 9.3                                        | 112.2 t (11.8)     |
| <b>8c<sup>d</sup></b> | 92.0 dd<br>(31.9) <sup>b</sup> (10.4) <sup>c</sup> | 89.3 dd<br>(33.7) <sup>b</sup> (9.7) <sup>c</sup>  | 2.7                                        | 113.8 t (11.0)     |
| <b>9</b>              | 101.6 d (25.9) <sup>b</sup>                        | 73.1 d (6.2) <sup>c</sup>                          | 28.5                                       | 111.0 d (5.9)      |
| <b>10</b>             | 101.6 d (24.1) <sup>b</sup>                        | 72.1 d (7.0) <sup>c</sup>                          | 29.5                                       | 110.6 d (5.0)      |
| <b>11a</b>            | 74.3 d (32.9) <sup>b</sup>                         | 70.3 br s                                          | 4.0                                        | 120.2 d (7.0)      |
| <b>11b</b>            | 76.6 d (30.8) <sup>b</sup>                         | 70.3 <sup>c</sup>                                  | 6.3                                        | 121.2 br s         |
| <b>12a</b>            | 92.4 d (30.5) <sup>b</sup>                         | 84.0 d (5.4) <sup>c</sup>                          | 8.4                                        | 121.2 d (6.9)      |
| <b>12b</b>            | 90.4 d (30.7) <sup>b</sup>                         | 86.5 d (6.0) <sup>c</sup>                          | 3.9                                        | 120.9 d (8.2)      |
| <b>13a</b>            | 93.7 d (28.4) <sup>b</sup>                         | 86.9 d (6.9) <sup>c</sup>                          | 6.8                                        | 108.1 d (6.9)      |
| <b>13b</b>            | 91.1 d (27.8) <sup>b</sup>                         | 89.7 d (6.0) <sup>c</sup>                          | 1.4                                        | 108.5 d (7.0)      |

Abbreviations: d, doublet; dd, doublet of doublets; t, triplet; br s, broad singlet.

<sup>a</sup> The <sup>13</sup>C NMR spectra were recorded in CDCl<sub>3</sub> at 298 K except for **6** and **13** in which cases a 1:1 mixture of CDCl<sub>3</sub> and CH<sub>2</sub>Cl<sub>2</sub> was used. The <sup>13</sup>C–<sup>31</sup>P coupling constants are given in parenthesis. C<sub>t</sub> is terminal allyl carbon *trans* to the coordinated phosphorus atom. C<sub>t</sub>' is terminal allyl carbon *cis* to the coordinated phosphorus centre. C<sub>c</sub> is central allyl carbon. <sup>b</sup> J(P,C)<sub>trans</sub>. <sup>c</sup> J(P,C)<sub>cis</sub>. <sup>d</sup> For the isomers **8b** and **8c**, C<sub>t</sub> and C<sub>t</sub>' are the terminal allyl carbon *trans* to –PPh<sub>2</sub> and *trans* to –PPh(N<sub>2</sub>C<sub>3</sub>HMe<sub>2-3,5</sub>) groups respectively. <sup>e</sup> Overlapped with signal arising from the terminal allyl carbon resonance of major isomer, **11a**.

### Stereodynamic Behaviour of Allyl Complexes **11-13** in Solution

The selective exchanges observed between the two diastereomers of **11** are summarised in Scheme E.S.1.

**Scheme E. S. 1**

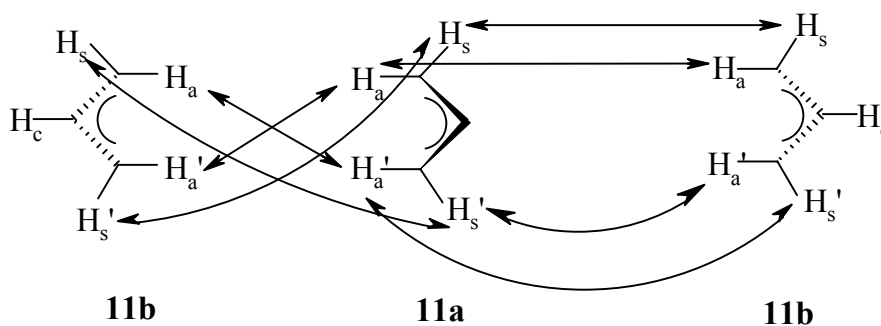

The exchange cross-peaks in the phase sensitive  $^1\text{H} - ^1\text{H}$  NOESY spectrum are identified as negative phase cross-peaks (appear as dis-continuous cross-peaks) while the positive phase cross-peaks (appear as continuous cross-peaks) which usually arise because of proximal relationships of the interacting protons. There are various positive phase NOE cross-peaks between the two isomers **11a** and **11b**. This type of unusual positive NOE between the two diastereomers arises as a result of a fast dynamic process. The exchange observations are summarised in Scheme E.S. 2.

**Scheme E.S. 2**

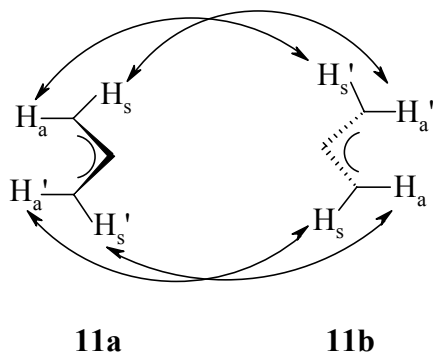

The  $^1\text{H}$ - $^1\text{H}$  NOESY spectrum of **12** (illustrated in Fig. E.S.1) shows positive NOE cross-peaks between the isomers **12a** and **12b** (see Scheme E.S.3) and the pattern of this interaction is similar to that observed for isomers **11a** and **11b** (shown in Scheme E.S. 2) indicating that similar mechanistic pathways operate in both the cases.

**Scheme E.S.3**

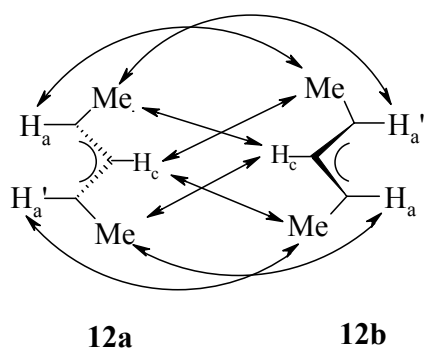



**Fig. E.S.1** The  $^1\text{H}$ - $^1\text{H}$  NOESY spectrum of complex **12** showing positive phase NOE cross-peaks between the isomers **12a** and **12b**.

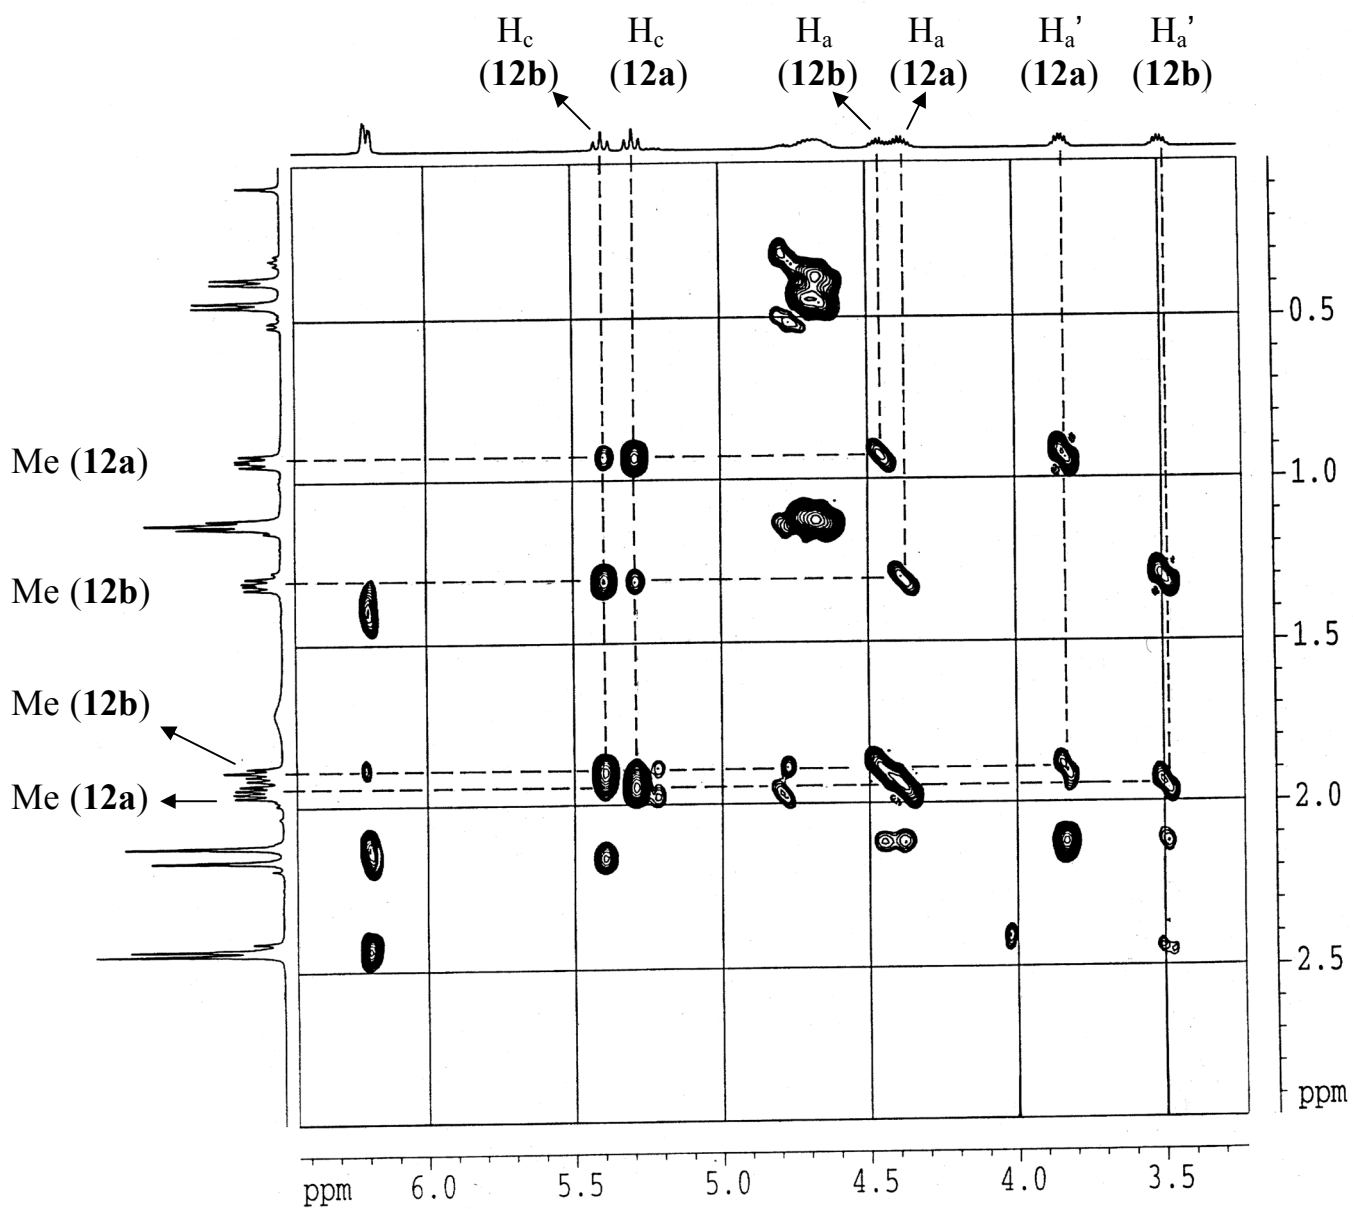

Supplement: b207447h.pdf [file b207447h.pdf]
